# Supplementary material for: Subnanometric Pt clusters dispersed over Cs-doped TiO2 for CO2 upgrading via low-temperature RWGS: operando mechanistic insights to guide an optimal catalyst design
Source: Royal Society of Chemistry journal article supplement (doi:10.1039/d3ta05482a), 2023-12-11
Supplement: d3ta05482a1.pdf [file d3ta05482a1.pdf]

## Supporting information

# Subnanometric Pt clusters dispersed over Cs-doped TiO<sub>2</sub> for CO<sub>2</sub> upgrading via low-temperature RWGS reaction: *operando* mechanistic insights to guide an optimal catalysts design

*Guillermo Torres-Sempere<sup>1</sup>, Rubén Bay-Roger<sup>1</sup>, Ligia A. Luque-Álvarez<sup>1</sup>, José L. Santos<sup>1,2</sup>, Luis F. Bobadilla<sup>1</sup>, Laura Pastor-Pérez<sup>1</sup>, Miguel A. Centeno<sup>1</sup>, Willinton Y. Hernández<sup>3</sup>, Ibraheem Youssef<sup>3</sup>, José A. Odriozola<sup>1</sup> and Tomas R. Reina<sup>1,\*</sup>*

<sup>1</sup>Inorganic Chemistry Department and Materials Sciences Institute, University of Seville-CSIC, Sevilla, 41092, Spain

<sup>2</sup>King Abdullah University of Science and Technology, Thuwal, Saudi Arabia

<sup>3</sup>ALBA Synchrotron, Carrer de la Llum 2-26, Cerdanyola del Vallès, 08290 Barcelona (Spain)

(\* **Corresponding autor:** Tomas R. Reina ([tramirez@us.es](mailto:tramirez@us.es))

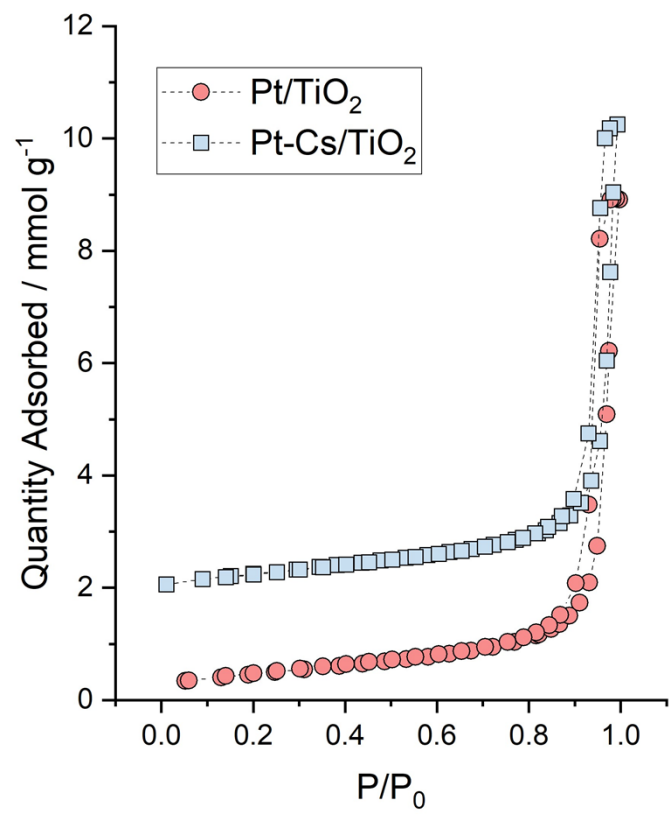

**Figure S1.** N<sub>2</sub> adsorption-desorption isotherms at 77 K for both Pt/TiO<sub>2</sub> and Pt-Cs/TiO<sub>2</sub> catalysts

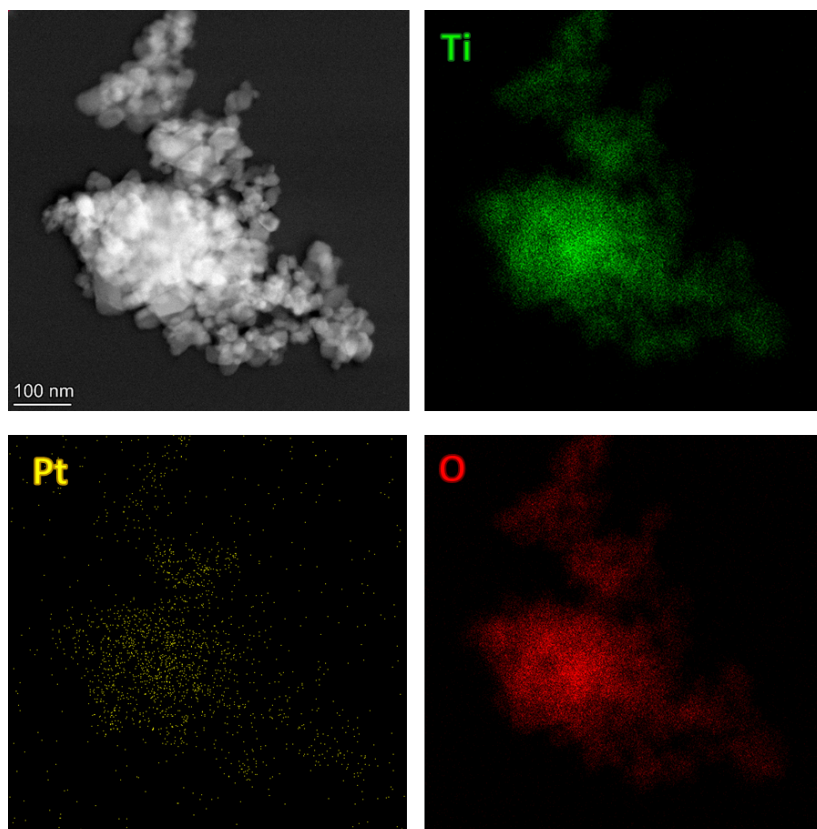

**Figure S2.** HAADF-STEM with elemental mapping images of Pt/TiO<sub>2</sub> catalyst after pre-treatment at 550 °C in 50 % H<sub>2</sub>/N<sub>2</sub> for 3 h

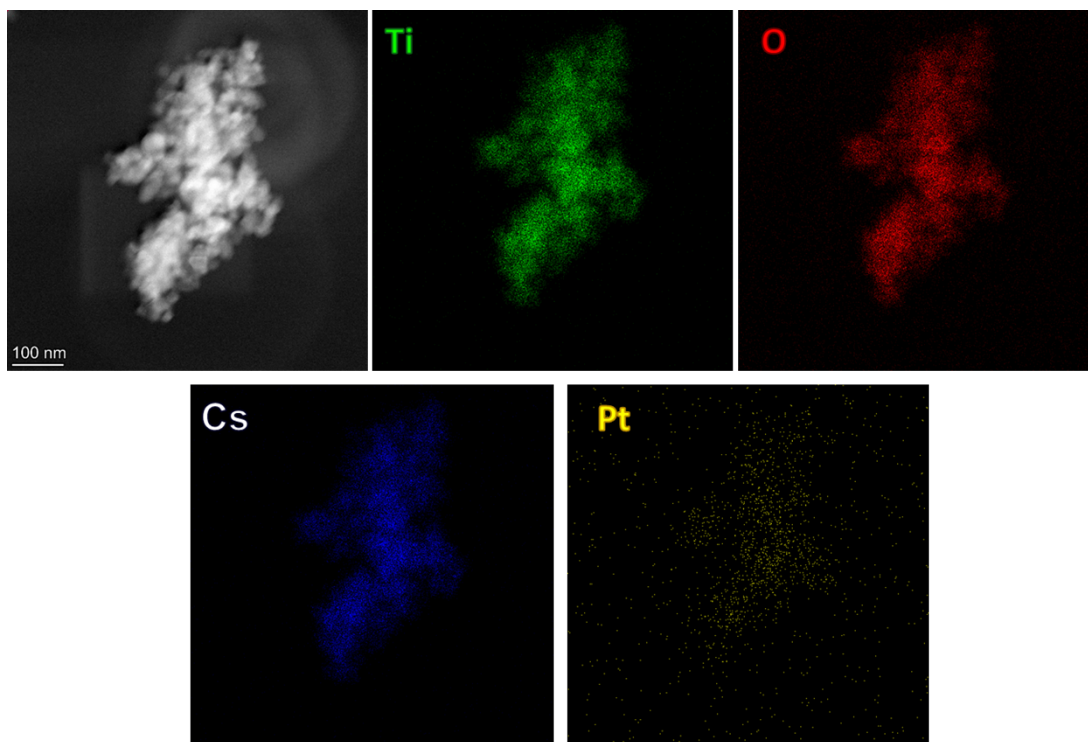

**Figure S3.** HAADF-STEM with elemental mapping images of Pt-Cs/TiO<sub>2</sub> catalyst after pre-treatment at 550 °C in 50 % H<sub>2</sub>/N<sub>2</sub> for 3 h

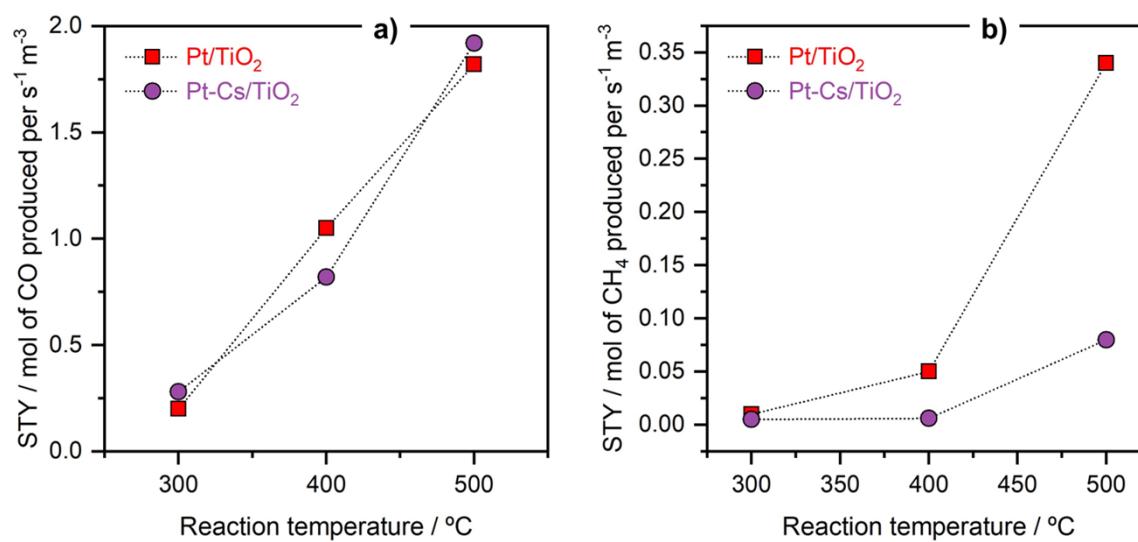

**Figure S4.** Space-time yield (STY) in terms of CO production **(a)** and CH<sub>4</sub> production **(b)** for Pt/TiO<sub>2</sub> and Pt-Cs/TiO<sub>2</sub> catalysts.

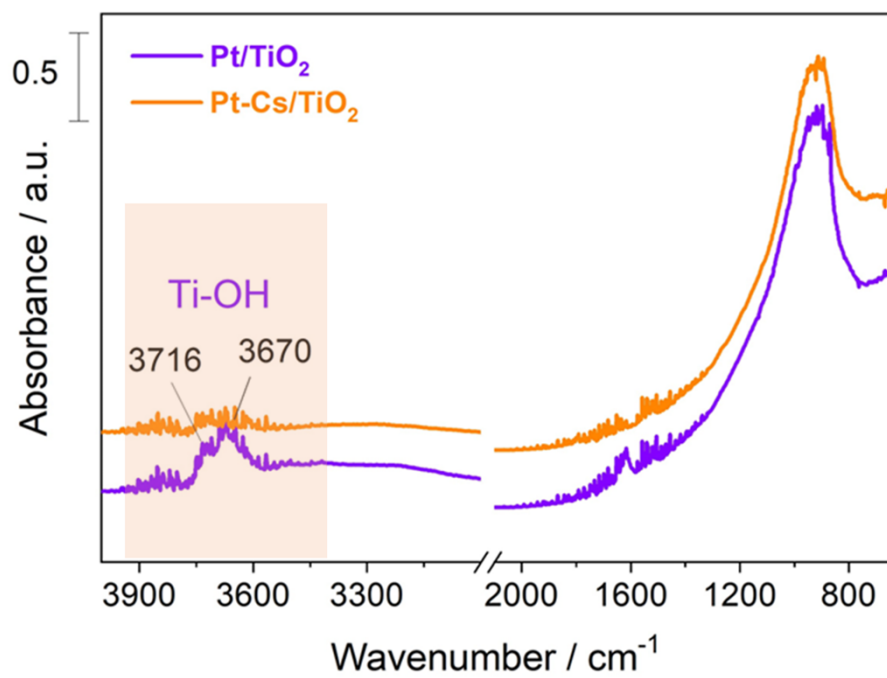

**Figure S5.** DRIFTS spectra of Pt/TiO<sub>2</sub> and Pt-Cs/TiO<sub>2</sub> after being activated at 400 °C for 1 h with a flow of 50 mL min<sup>-1</sup> of 10% H<sub>2</sub>/Ar

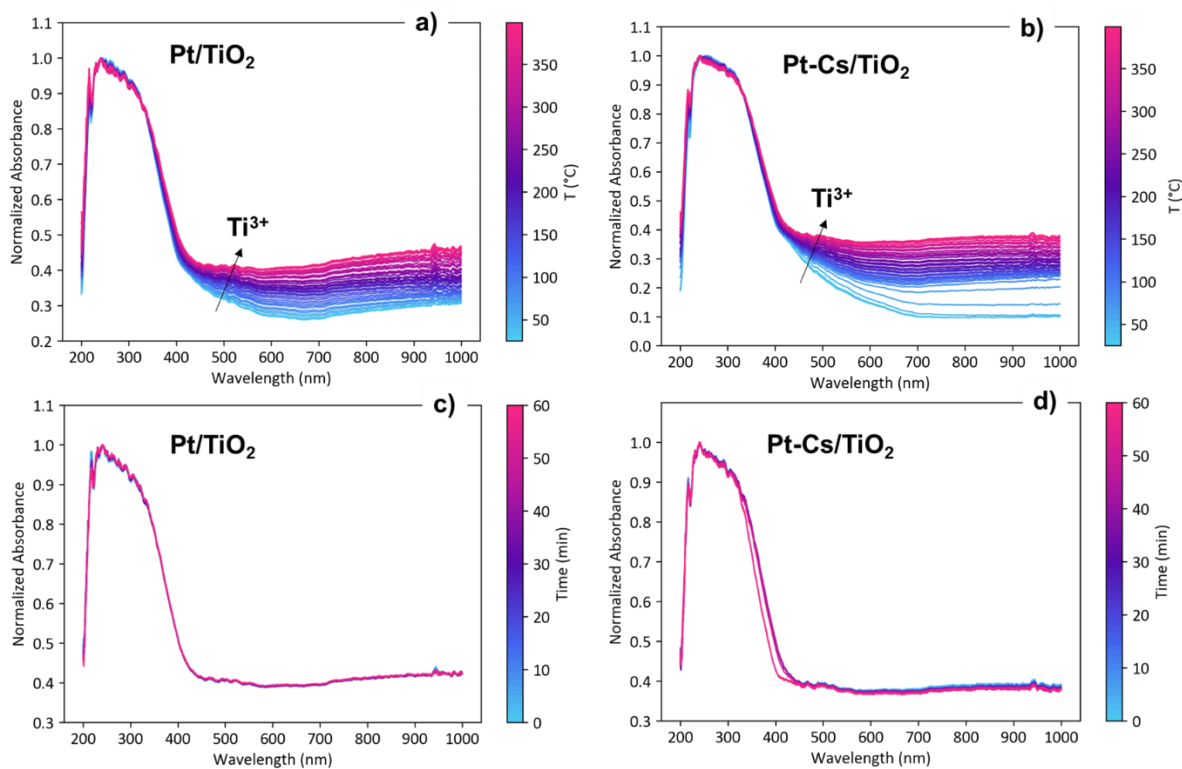

**Figure S6.** Evolution of UV-Vis spectra as a function of the temperature during the activation pretreatment in flow of 10% H<sub>2</sub>/Ar (**a-b**) and as a function of the time during the RWGS reaction (5/20/25 mL min<sup>-1</sup> of CO<sub>2</sub>/H<sub>2</sub>/Ar, WHSV = 30 L g<sup>-1</sup> h<sup>-1</sup> and 1 bar) at 400 °C (**c-d**) for both catalysts.

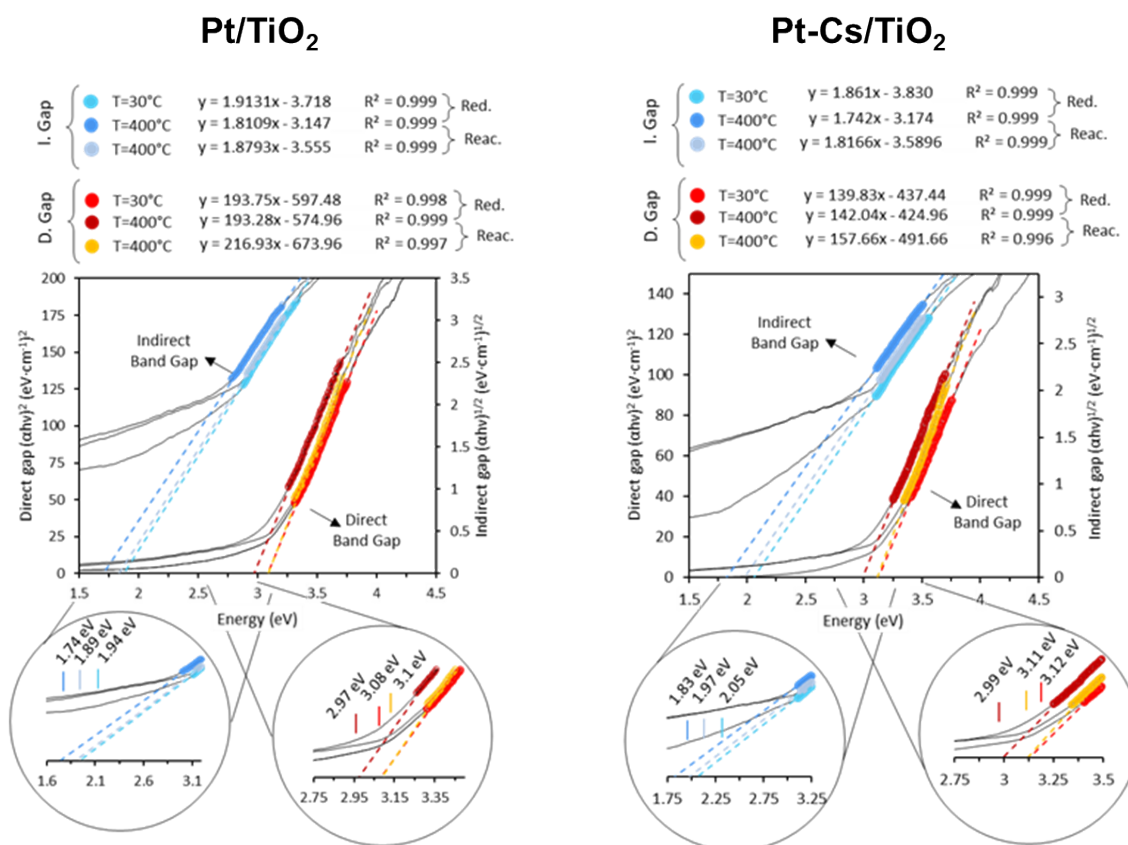

**Figure S7.** Estimation of direct and indirect energy band gaps using the Tauc plot method for both fresh catalysts, after activation (50 mL min<sup>-1</sup> 10% H<sub>2</sub>/Ar, 400 °C, 1h) and after 1h of RWGS reaction (5/20/25 mL min<sup>-1</sup> of CO<sub>2</sub>/H<sub>2</sub>/Ar, WHSV = 30 L g<sup>-1</sup> h<sup>-1</sup>, 400 °C and 1 bar)
